# Supplementary material for: Lethal/sublethal responses of Daphnia magna to acute norfloxacin contamination and changes in phytoplankton-zooplankton interactions induced by this antibiotic
Source: PubMed Central journal article supplement (PMC5227989; doi:10.1038/srep40385), 2017-01-12
Supplement: srep40385-s1.pdf [file srep40385-s1.pdf]

**Lethal/sublethal responses of *Daphnia magna* to acute norfloxacin contamination  
and changes in phytoplankton-zooplankton interactions induced by this  
antibiotic**

Ying Pan<sup>1†</sup>, Shi-wei Yan<sup>1†</sup>, Ruozhu Li<sup>1</sup>, Yi-wen Hu<sup>2</sup>, Xue-xiu Chang<sup>1\*</sup>

<sup>1</sup>School of Ecology and Environmental Sciences, Yunnan University, Kunming

650091, China

<sup>2</sup>Department of Biology, Yunnan University, Kunming 650091, China

† These authors contributed equally to this work

\* Corresponding author: E-mail: [changxx@ynu.edu.cn](mailto:changxx@ynu.edu.cn)

Tel: +86 871 5033547; fax: +86 871 5033547

**Supplementary Fig. S1** A conceptual figure of the effects of norfloxacin

concentration in affecting phytoplankton-zooplankton interactions. This figure was

produced in Microsoft PowerPoint 2016.

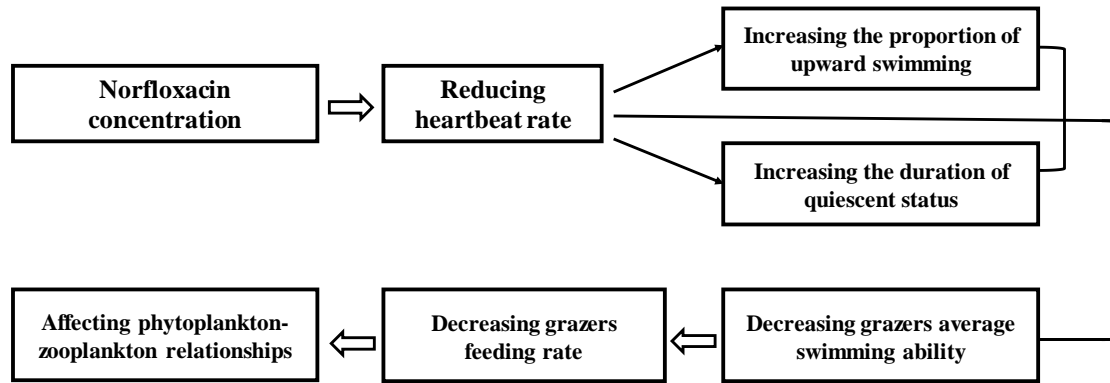

**Supplementary Table S1** Heartbeat rate and average swimming ability of *Daphnia magna* individuals under different solutions (containing both NaOH and HCl as the norfloxacin solutions, but without adding norfloxacin) after 12 h of exposure cultivation. Different letters indicate significant differences among treatments. Multiple comparisons of means were performed using Tukey's test at the 0.05 significance level.

| Concentration of two solubilizers                          | n | Heartbeat rate<br>(per minute) | Average swimming ability<br>(mm s <sup>-1</sup> ) |
|------------------------------------------------------------|---|--------------------------------|---------------------------------------------------|
| Without two solubilizers                                   | 5 | 394.0±11.9 <sup>a</sup>        | 0.36±0.10 <sup>a</sup>                            |
| As the norfloxacin concentration of 25 mg L <sup>-1</sup>  | 5 | 398.8±17.1 <sup>a</sup>        | 0.37±0.06 <sup>a</sup>                            |
| As the norfloxacin concentration of 50 mg L <sup>-1</sup>  | 5 | 389.0±13.6 <sup>a</sup>        | 0.34±0.11 <sup>a</sup>                            |
| As the norfloxacin concentration of 100 mg L <sup>-1</sup> | 5 | 385.0±27.0 <sup>a</sup>        | 0.31±0.05 <sup>a</sup>                            |
